# Supplementary material
Source: Springer Nature journal article supplement (http://www.springermedizin.de/resource/supplementary/12916_2011_483_MOESM1_ESM.pdf/9598036)

Cell membrane

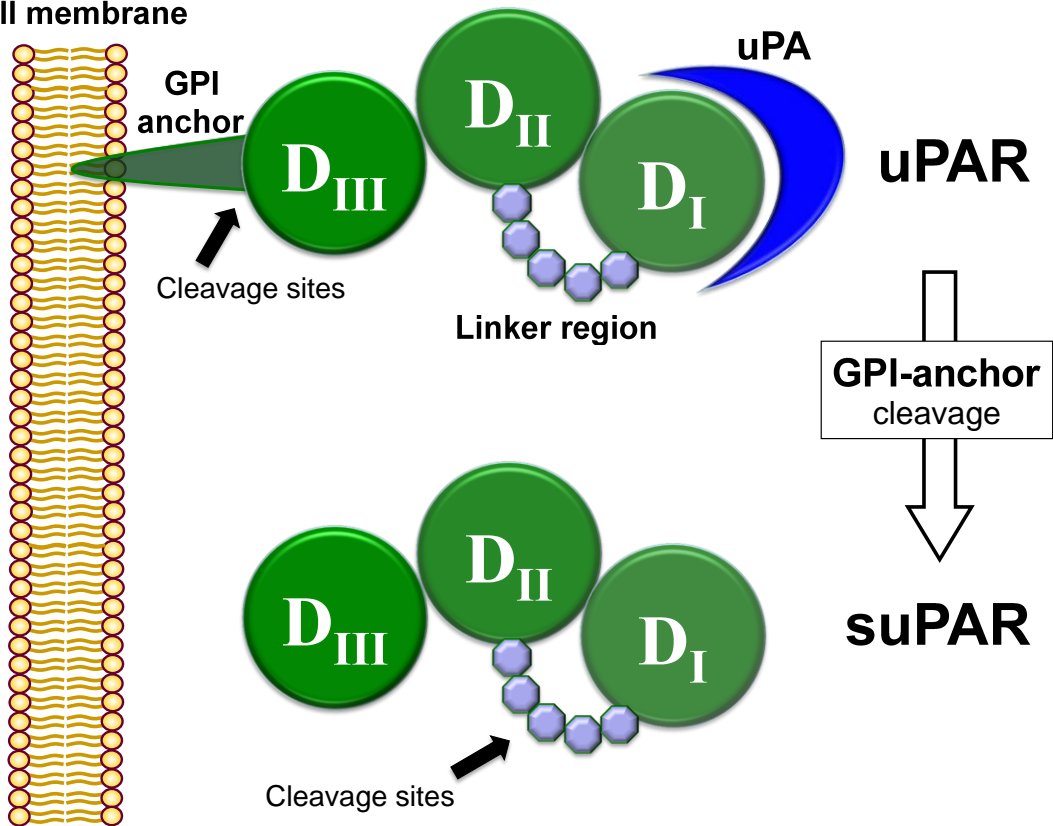

Supplement: MOESM1 [file 9598036]
